# Supplementary material for: Spatiotemporal variations in atmospheric CH 4 concentrations and enhancements in northern China based on a comprehensive dataset: Ground-based observations, TROPOMI data, inventory data and inversions
Source: Copernicus journal article supplement (doi:10.5194/egusphere-2024-2162), 2024-09-09
Supplement: Supplementary file 1 [file egusphere-2024-2162-supplement.pdf]

Supplementary for:

## **The spatial-temporal variations of atmospheric CH<sub>4</sub> concentrations and urban enhancements over the northern China based on a comprehensive dataset: ground-based observations, TROPOMI, inventory and inversions**

Pengfei Han<sup>1,2\*</sup>, Ning Zeng<sup>3</sup>, Bo Yao<sup>4</sup>, Wen Zhang<sup>5</sup>, Weijun Quan<sup>6</sup>, Pucui Wang<sup>2</sup>, Ting Wang<sup>2</sup>, Minqiang Zhou<sup>1,2</sup>, Qixiang Cai<sup>7,8\*</sup>, Yuzhong Zhang<sup>9,10</sup>, Ruosi Liang<sup>9,10</sup>, Wanqi Sun<sup>11</sup>, Shengxiang Liu<sup>2,12</sup>

<sup>1</sup>State Key Laboratory of Atmospheric Environment and Extreme Meteorology, Institute of Atmospheric Physics, Chinese Academy of Sciences, Beijing 100029, China

<sup>2</sup>Carbon Neutrality Research Center, Institute of Atmospheric Physics, Chinese Academy of Sciences, Beijing, China

<sup>3</sup>Department of Atmospheric and Oceanic Science, and Earth System Science Interdisciplinary Center, University of Maryland, College Park, Maryland, USA

<sup>4</sup>Department of Atmospheric and Oceanic Sciences & Institute of Atmospheric Sciences, Fudan University, Shanghai, China

<sup>5</sup>State Key Laboratory of Atmospheric Boundary Layer Physics and Atmospheric Chemistry, Institute of Atmospheric Physics, Chinese Academy of Sciences, Beijing, China

<sup>6</sup>Institute of Urban Meteorology (Key Laboratory of Urban Meteorology), China Meteorological Administration, Beijing, China

<sup>7</sup>State Key Laboratory of Numerical Modeling for Atmospheric Sciences and Geophysical Fluid Dynamics, Institute of Atmospheric Physics, Chinese Academy of Sciences, Beijing, China

<sup>8</sup>Qiluzhongke Institute of Carbon Neutrality, Jinan, China

<sup>9</sup>Key Laboratory of Coastal Environment and Resources of Zhejiang Province, School of Engineering, Westlake University, Hangzhou, Zhejiang, China

<sup>10</sup>Institute of Advanced Technology, Westlake Institute for Advanced Study, Hangzhou, Zhejiang, China

<sup>11</sup>Meteorological Observation Centre, China Meteorological Administration, Beijing, China

<sup>12</sup>Jiujiang University, Jiujiang, Jiangxi, China

\* *Correspondence to:* Pengfei Han (pphan@mail.iap.ac.cn); Qixiang Cai (caiqixiang@mail.iap.ac.cn)

|                                                                                                                                                                                                                                                                                                               |   |
|---------------------------------------------------------------------------------------------------------------------------------------------------------------------------------------------------------------------------------------------------------------------------------------------------------------|---|
| <b>Fig. S1</b> Wind rose plots at three regional sites: BJ (Beijing), XH (Xianghe), and SDZ (Shangdianzi).                                                                                                                                                                                                    | 3 |
| <b>Fig. S2</b> Sectoral CH <sub>4</sub> emissions for the North China at provincial scale in 2019                                                                                                                                                                                                             | 3 |
| <b>Fig. S3</b> Monthly mean CH <sub>4</sub> concentration enhancements of Beijing (BJ) and Xianghe (XH) compared with Shangdianzi (SDZ).                                                                                                                                                                      | 4 |
| <b>Fig. S4</b> Temporal variations of mean monthly XCH <sub>4</sub> (TROPOMI, TCCON) and surface CH <sub>4</sub> concentrations observed in XH (a, b), and correlation relationships of mean monthly XCH <sub>4</sub> (TROPOMI, TCCON) and surface concentrations observed by Picarro in XH during 2019-2021. | 4 |
| <b>Fig. S5</b> Hourly comparisons of optimized GEOS-Chem model simulations with in-situ high-precision measurements at three sites. MB is mean bias and RMSE is mean root square error. BJ, XH, and SDZ represent Beijing, Xianghe, and Shangdianzi observations.                                             | 5 |
| <b>Fig. S6</b> Monthly comparisons of WestLake and CAMS model simulations with in-situ high-precision measurements at three sites. MB is mean bias and RMSE is mean root square error. BJ, XH, and SDZ represent Beijing, Xianghe, and Shangdianzi observations.                                              | 5 |
| <b>Fig. S7</b> Posterior and observed seasonal mean column XCH <sub>4</sub> concentrations from WestLake (optimized GEOS-Chem, left 2 columns) and TROPOMI (right 2 columns) for the North China in 2019                                                                                                      | 6 |
| <b>Fig. S8</b> Correlation relationships of posterior (WestLake, in x-axis) and observed (TROPOMI, in y-axis) seasonal mean column XCH <sub>4</sub> concentrations.                                                                                                                                           | 7 |
| <b>Fig. S9</b> Model posterior monthly mean column CH <sub>4</sub> concentrations for the North China in 2019                                                                                                                                                                                                 | 7 |
| <b>Fig. S10</b> Relationships of TROPOMI XCH <sub>4</sub> with GEOS-Chem modeled surface CH <sub>4</sub> in each season and annual mean in 2019.                                                                                                                                                              | 8 |
| <b>Fig. S11</b> Relationships of TROPOMI XCH <sub>4</sub> with PKU-CH <sub>4</sub> emissions at grid levels in Shanxi Province in 2019.                                                                                                                                                                       | 8 |

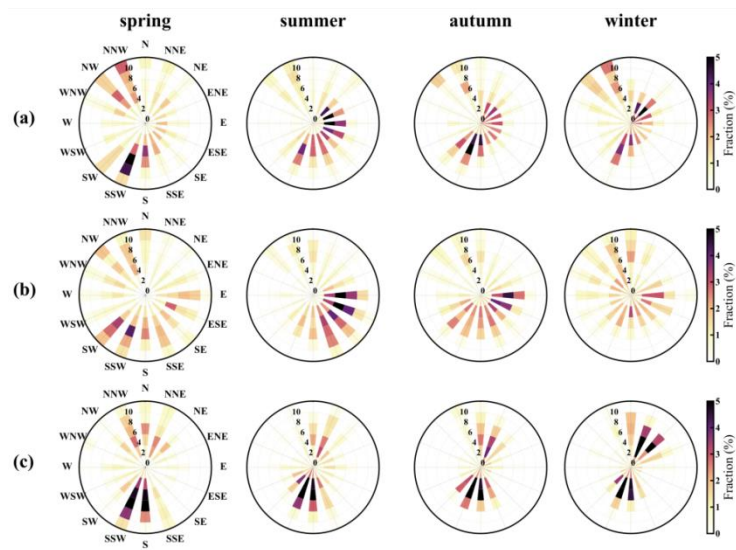

**Fig. S1** Wind rose plots at three regional sites: BJ (Beijing), XH (Xianghe), and SDZ (Shangdianzi).

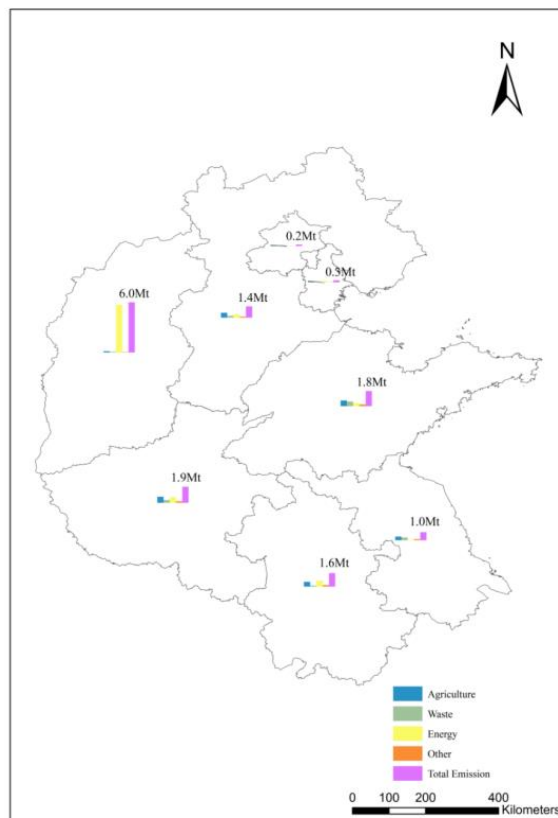

**Fig. S2** Sectoral CH<sub>4</sub> emissions for the North China at provincial scale in 2019

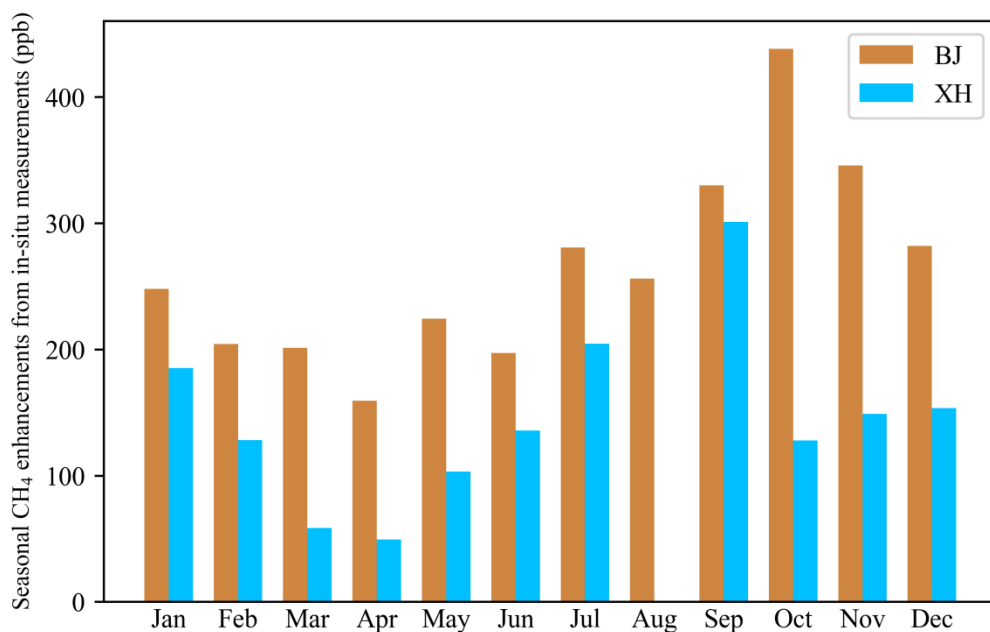

**Fig. S3 Monthly mean CH<sub>4</sub> concentration enhancements of Beijing (BJ) and Xianghe (XH) compared with Shangdianzi (SDZ).**

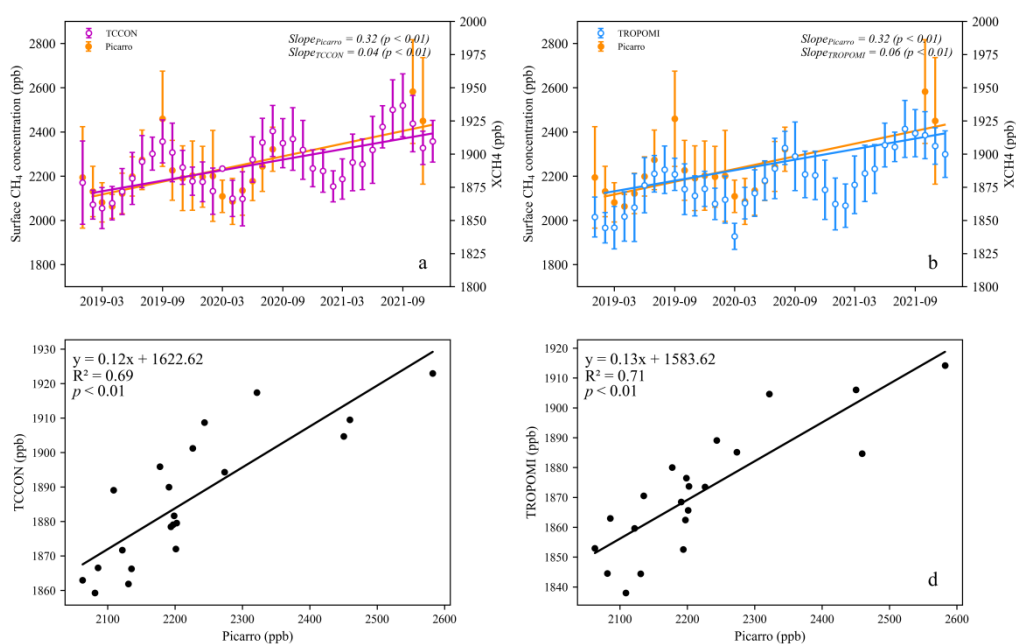

**Fig. S4 Temporal variations of mean monthly XCH<sub>4</sub> (TROPOMI, TCCON) and surface CH<sub>4</sub> concentrations observed in XH (a, b), and correlation relationships of mean monthly XCH<sub>4</sub> (TROPOMI, TCCON) and surface concentrations observed by Picarro in XH during 2019-2021.**

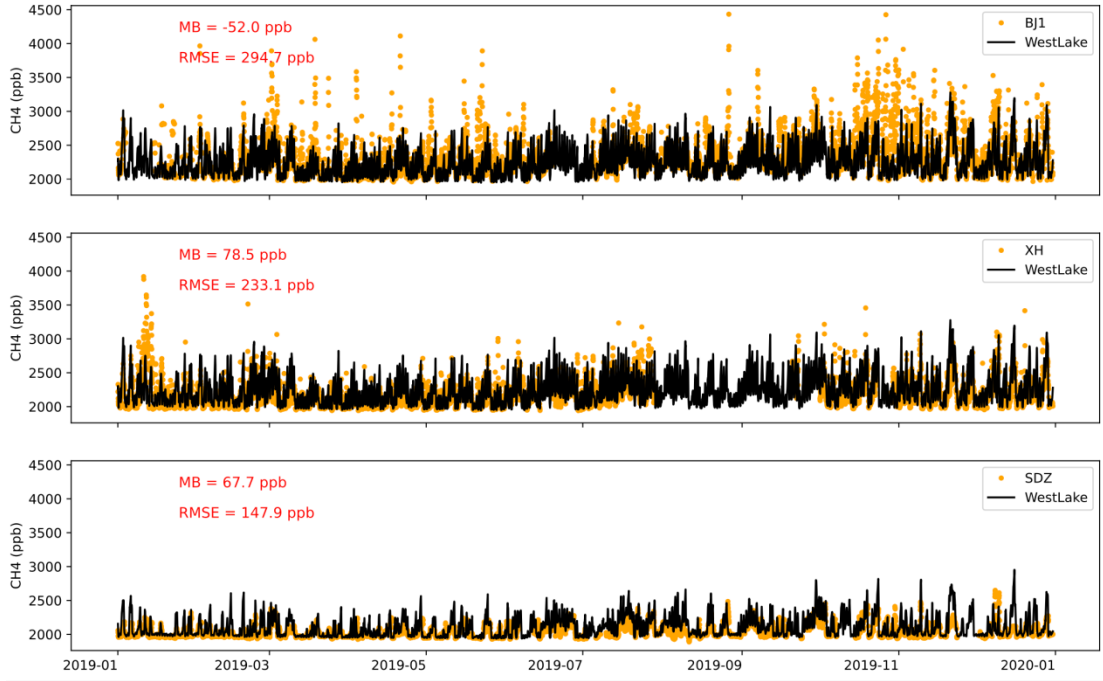

**Fig. S5** Hourly comparisons of optimized GEOS-Chem model simulations with in-situ high-precision measurements at three sites. MB is mean bias and RMSE is mean root square error. BJ, XH, and SDZ represent Beijing, Xianghe, and Shangdianzi observations.

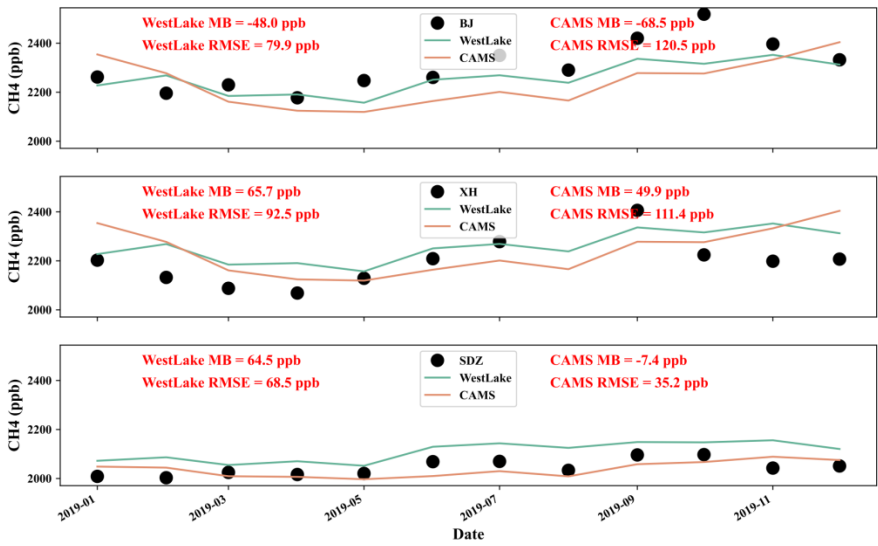

**Fig. S6** Monthly comparisons of WestLake and CAMS model simulations with in-situ high-precision measurements at three sites. MB is mean bias and RMSE is mean root square error. BJ, XH, and SDZ represent Beijing, Xianghe, and Shangdianzi observations.

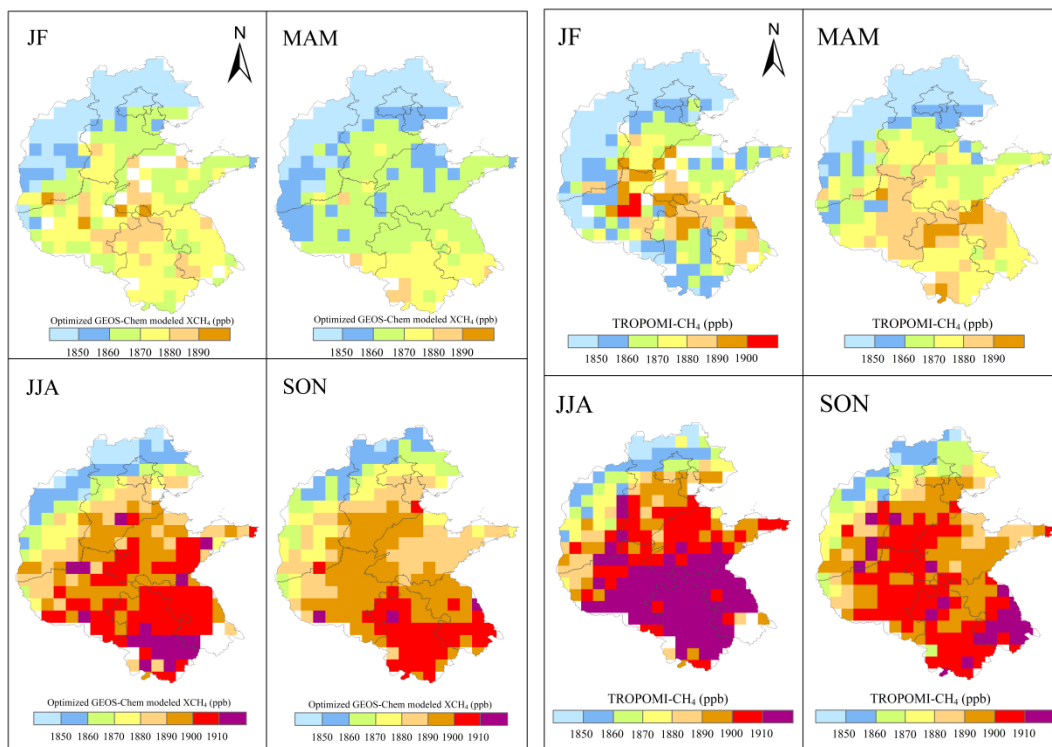

**Fig. S7** Posterior and observed seasonal mean column XCH<sub>4</sub> concentrations from WestLake (optimized GEOS-Chem, left 2 columns) and TROPOMI (right 2 columns) for the North China in 2019

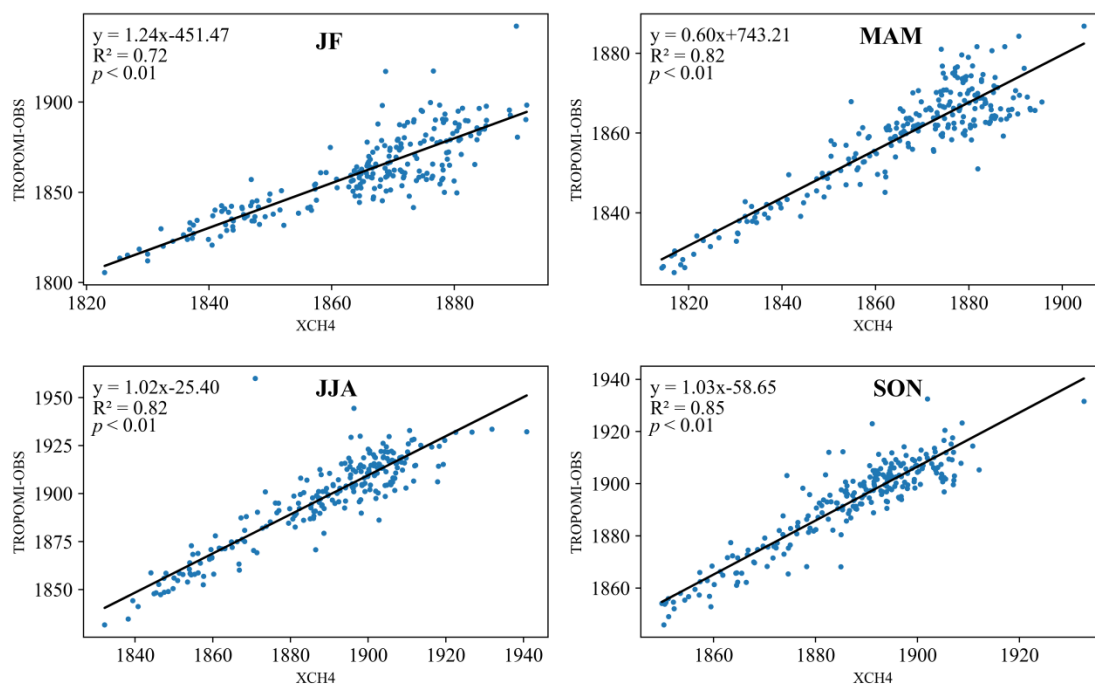

**Fig. S8 Correlation relationships of posterior (WestLake, in x-axis) and observed (TROPOMI, in y-axis) seasonal mean column XCH<sub>4</sub> concentrations.**

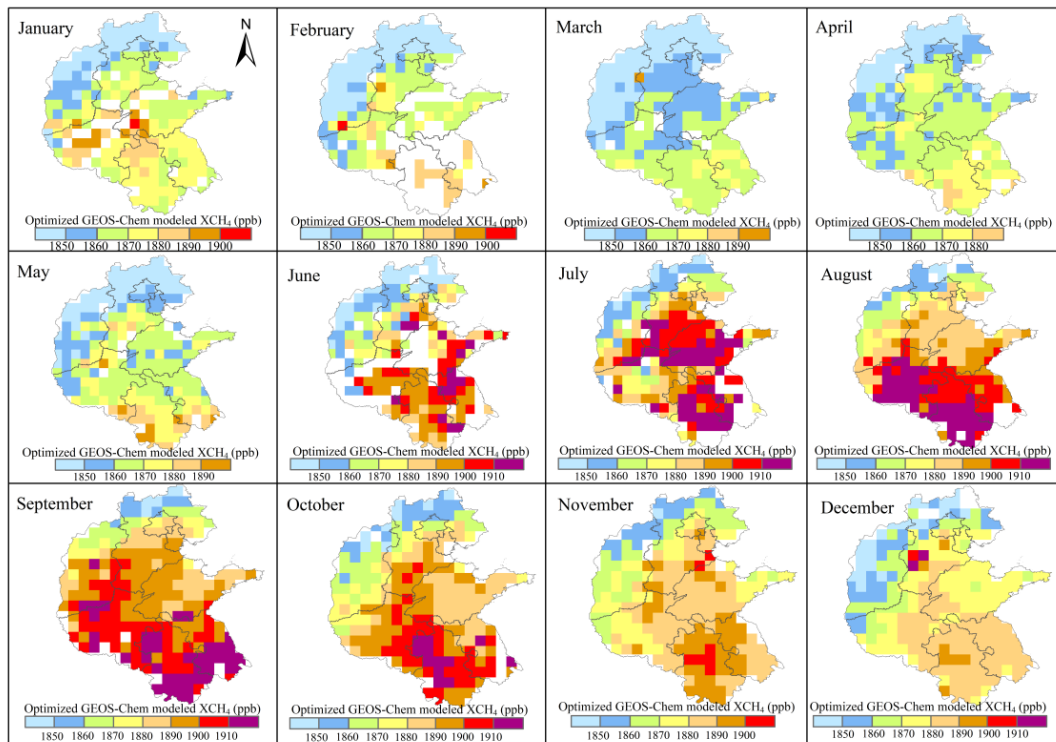

**Fig. S9 Model posterior monthly mean column CH<sub>4</sub> concentrations for the North China in 2019**

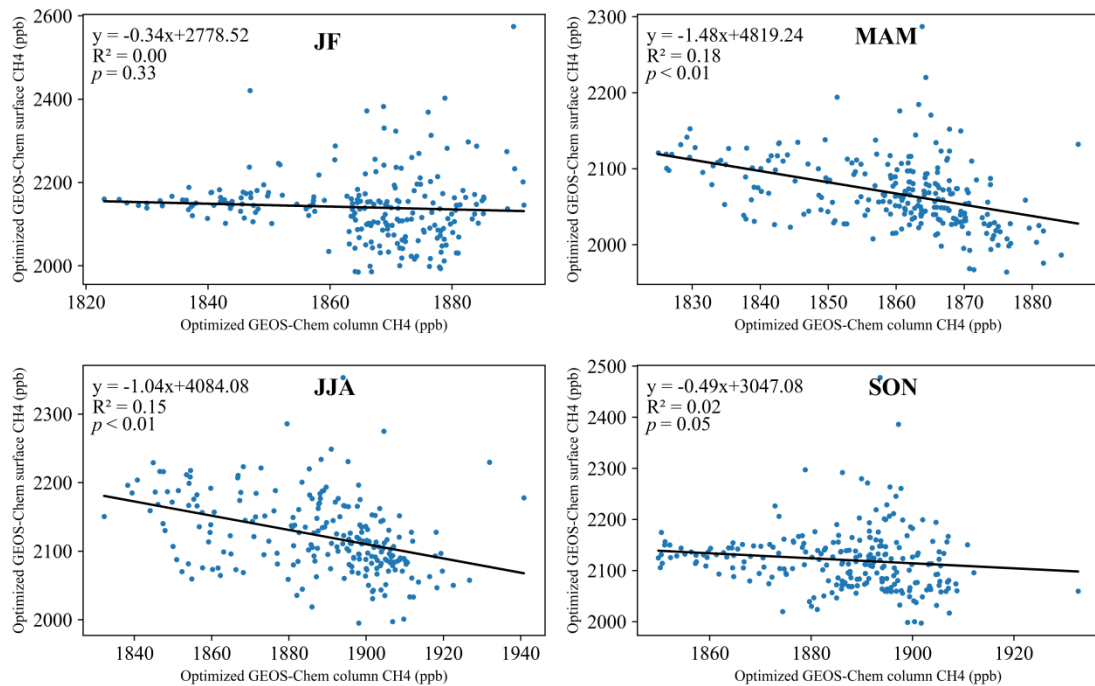

**Fig. S10 Relationships of TROPOMI XCH<sub>4</sub> with GEOS-Chem modeled surface CH<sub>4</sub> in each season in 2019.**

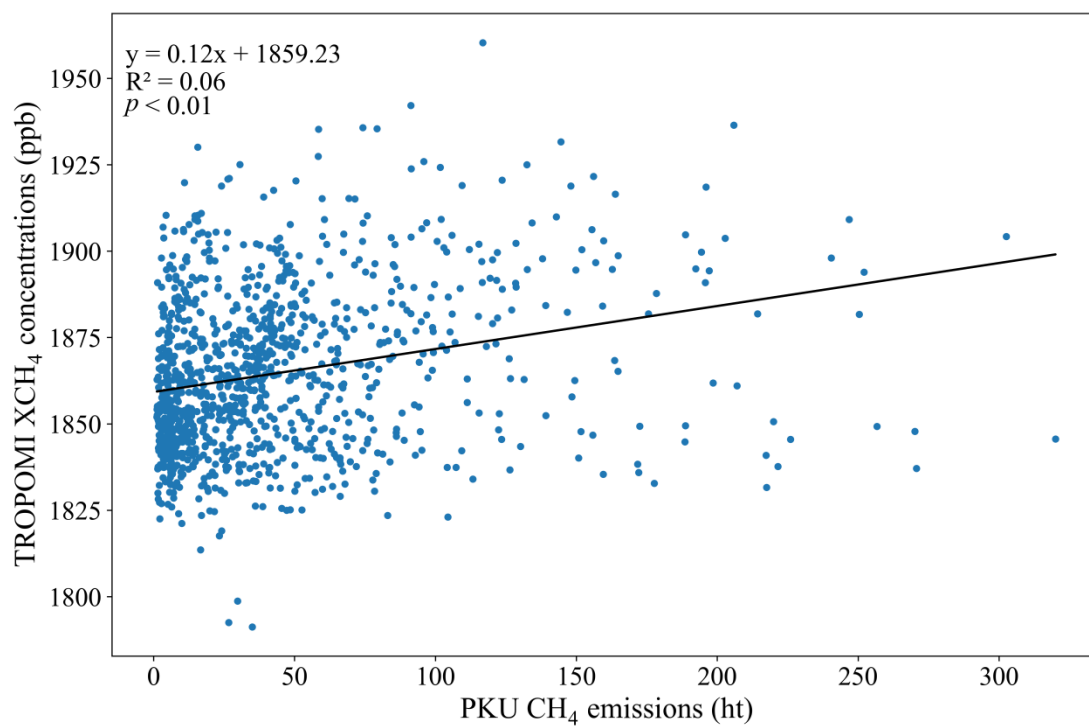

**Fig. S11 Relationships of TROPOMI XCH<sub>4</sub> with PKU-CH<sub>4</sub> emissions at grid levels in Shanxi Province in 2019.**
